# Supplementary material
Source: PubMed Central journal article supplement (PMC11195538)

Case 5

205982890041\_R04C01

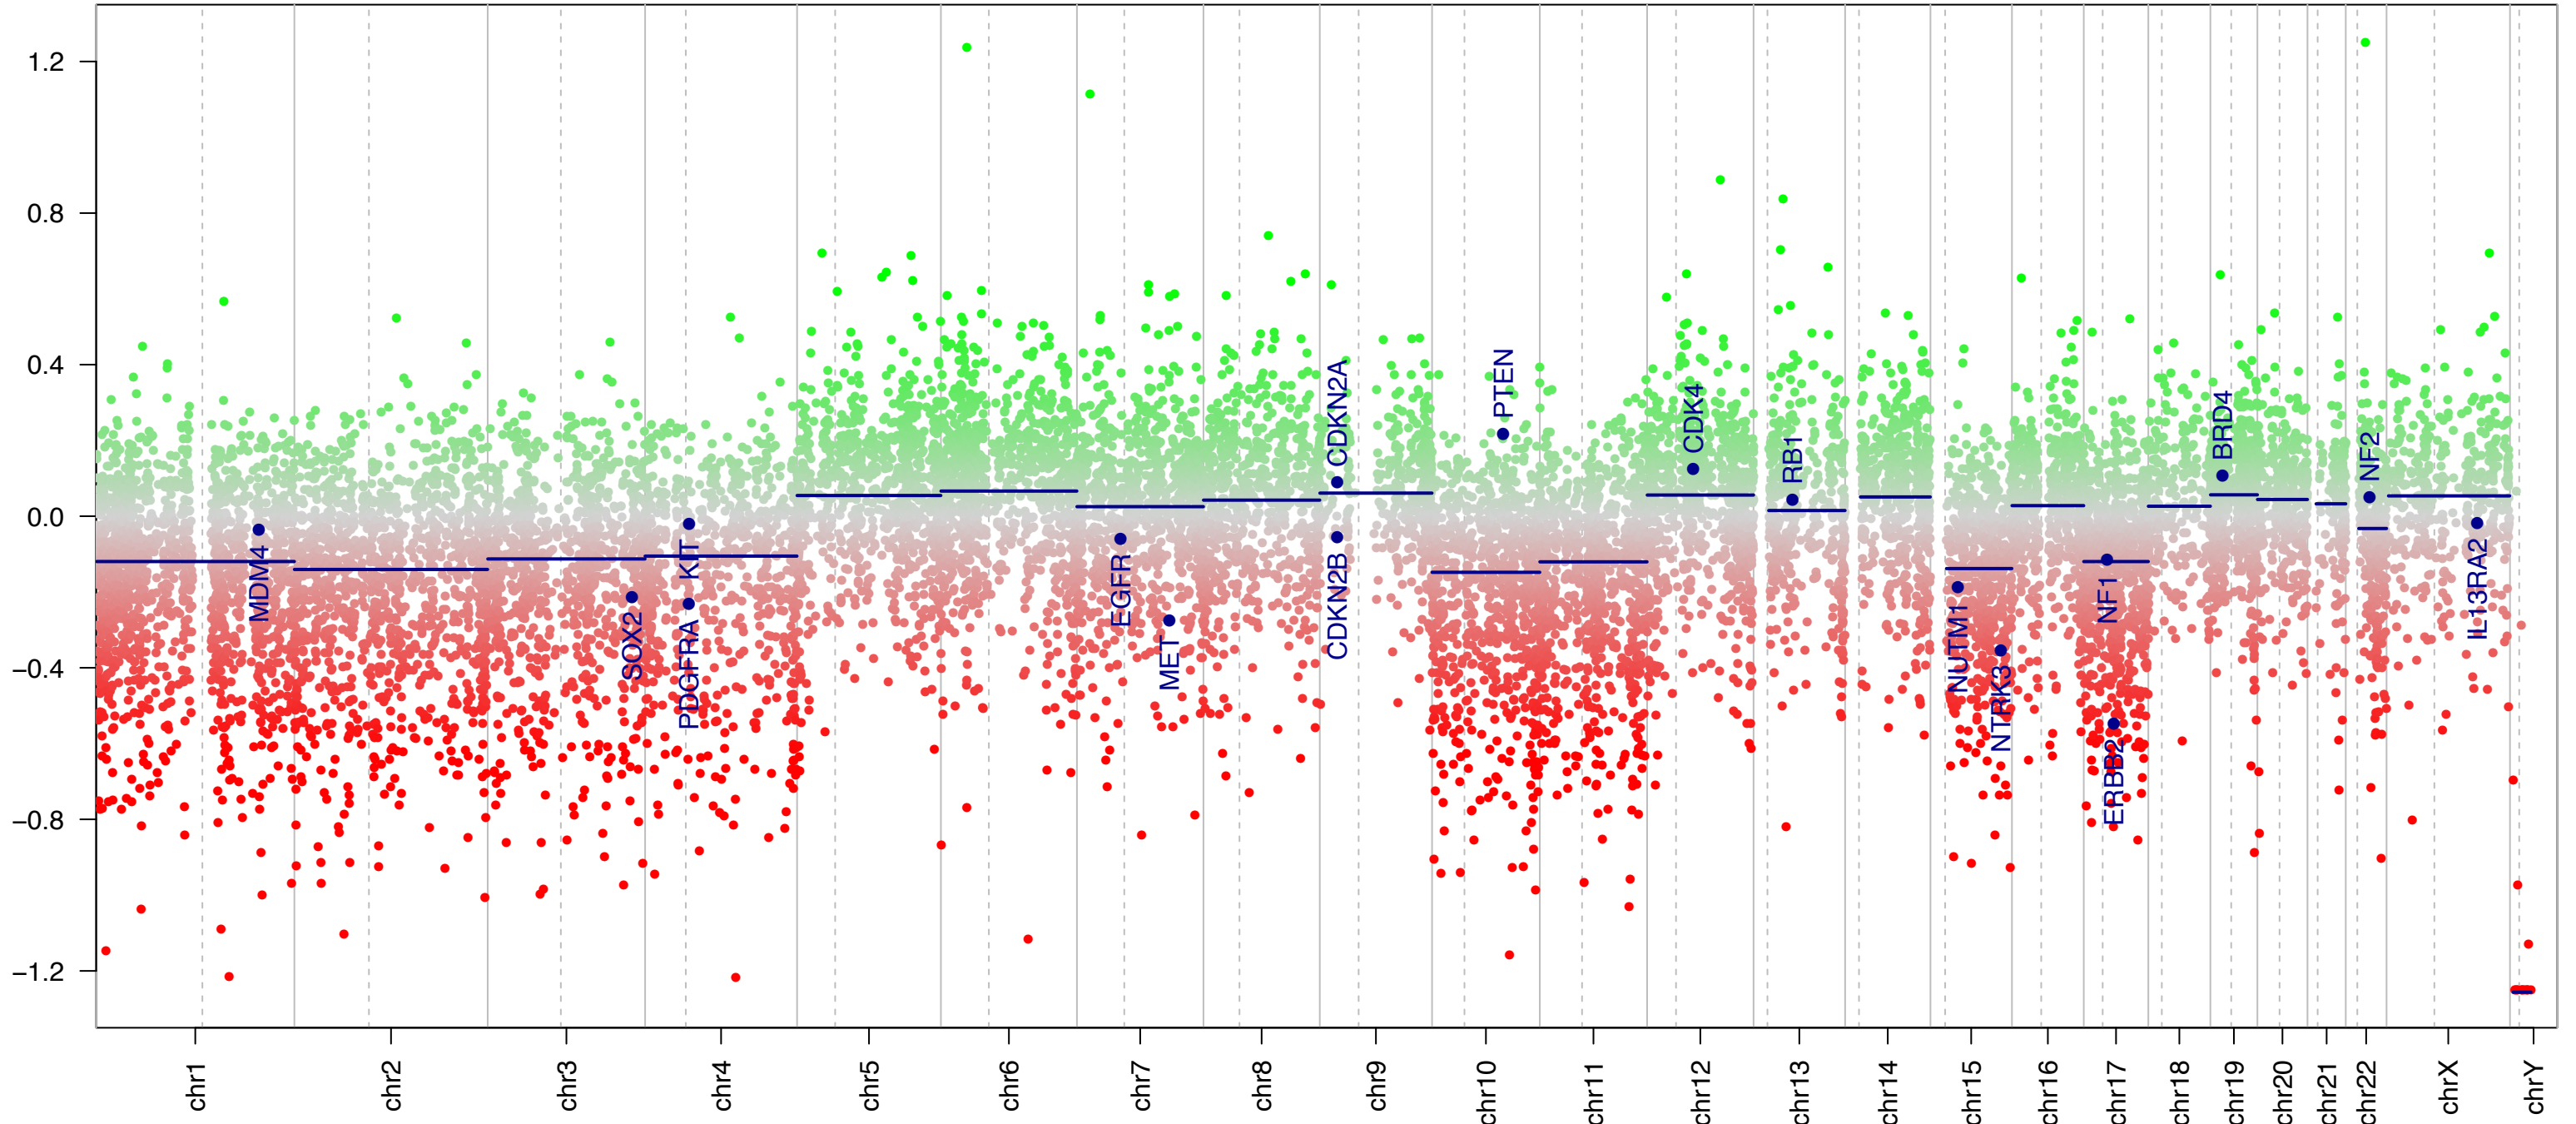

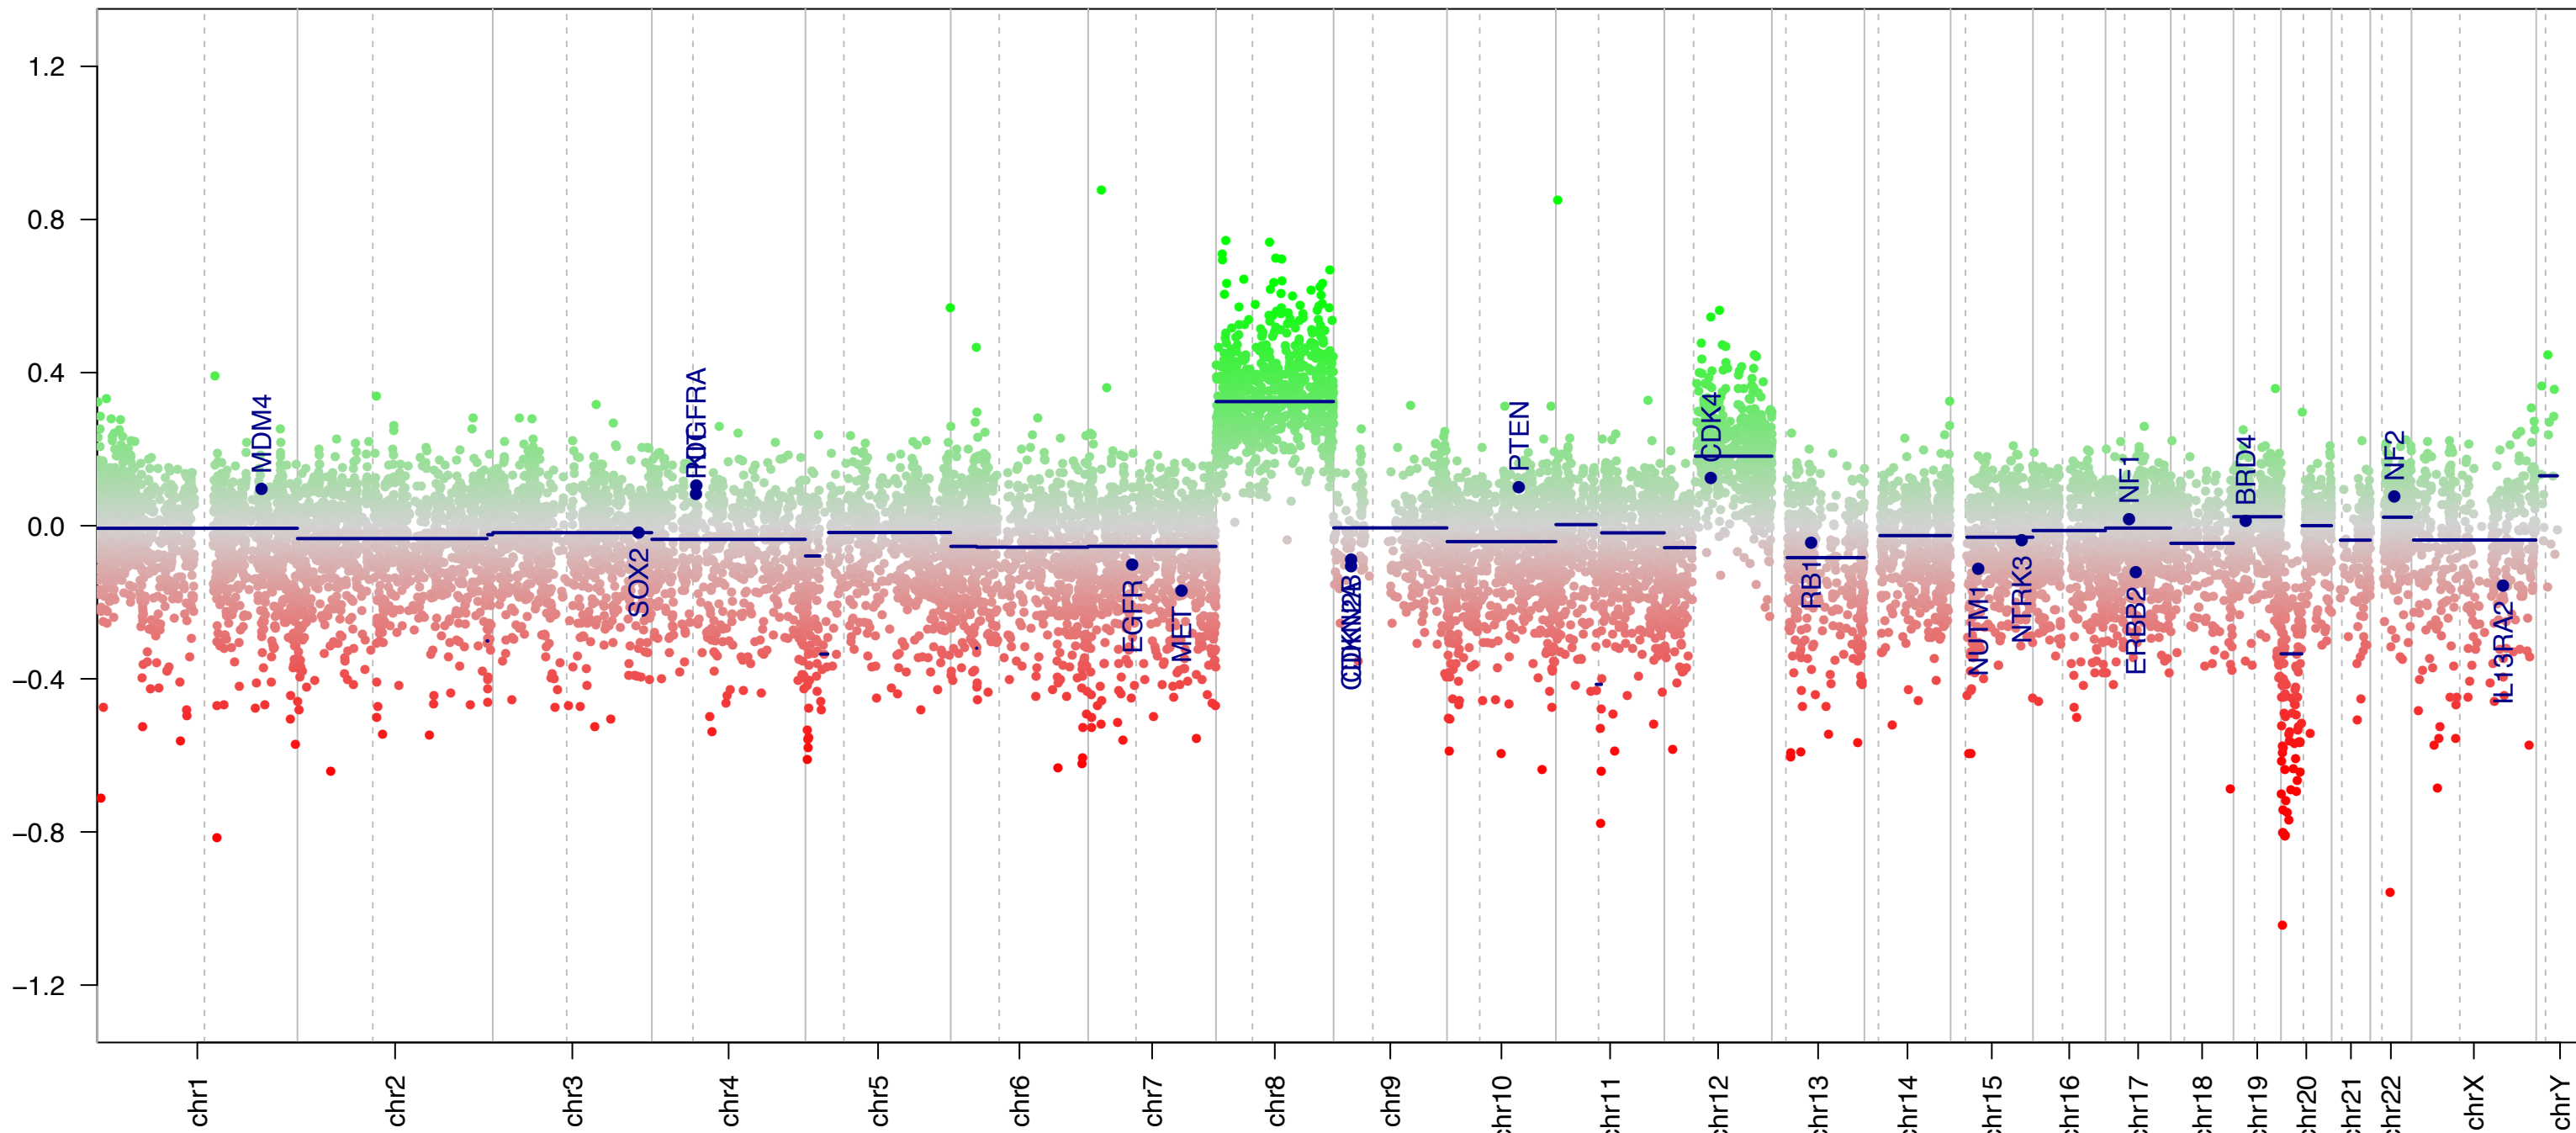

Case 8

206054070160\_R08C01

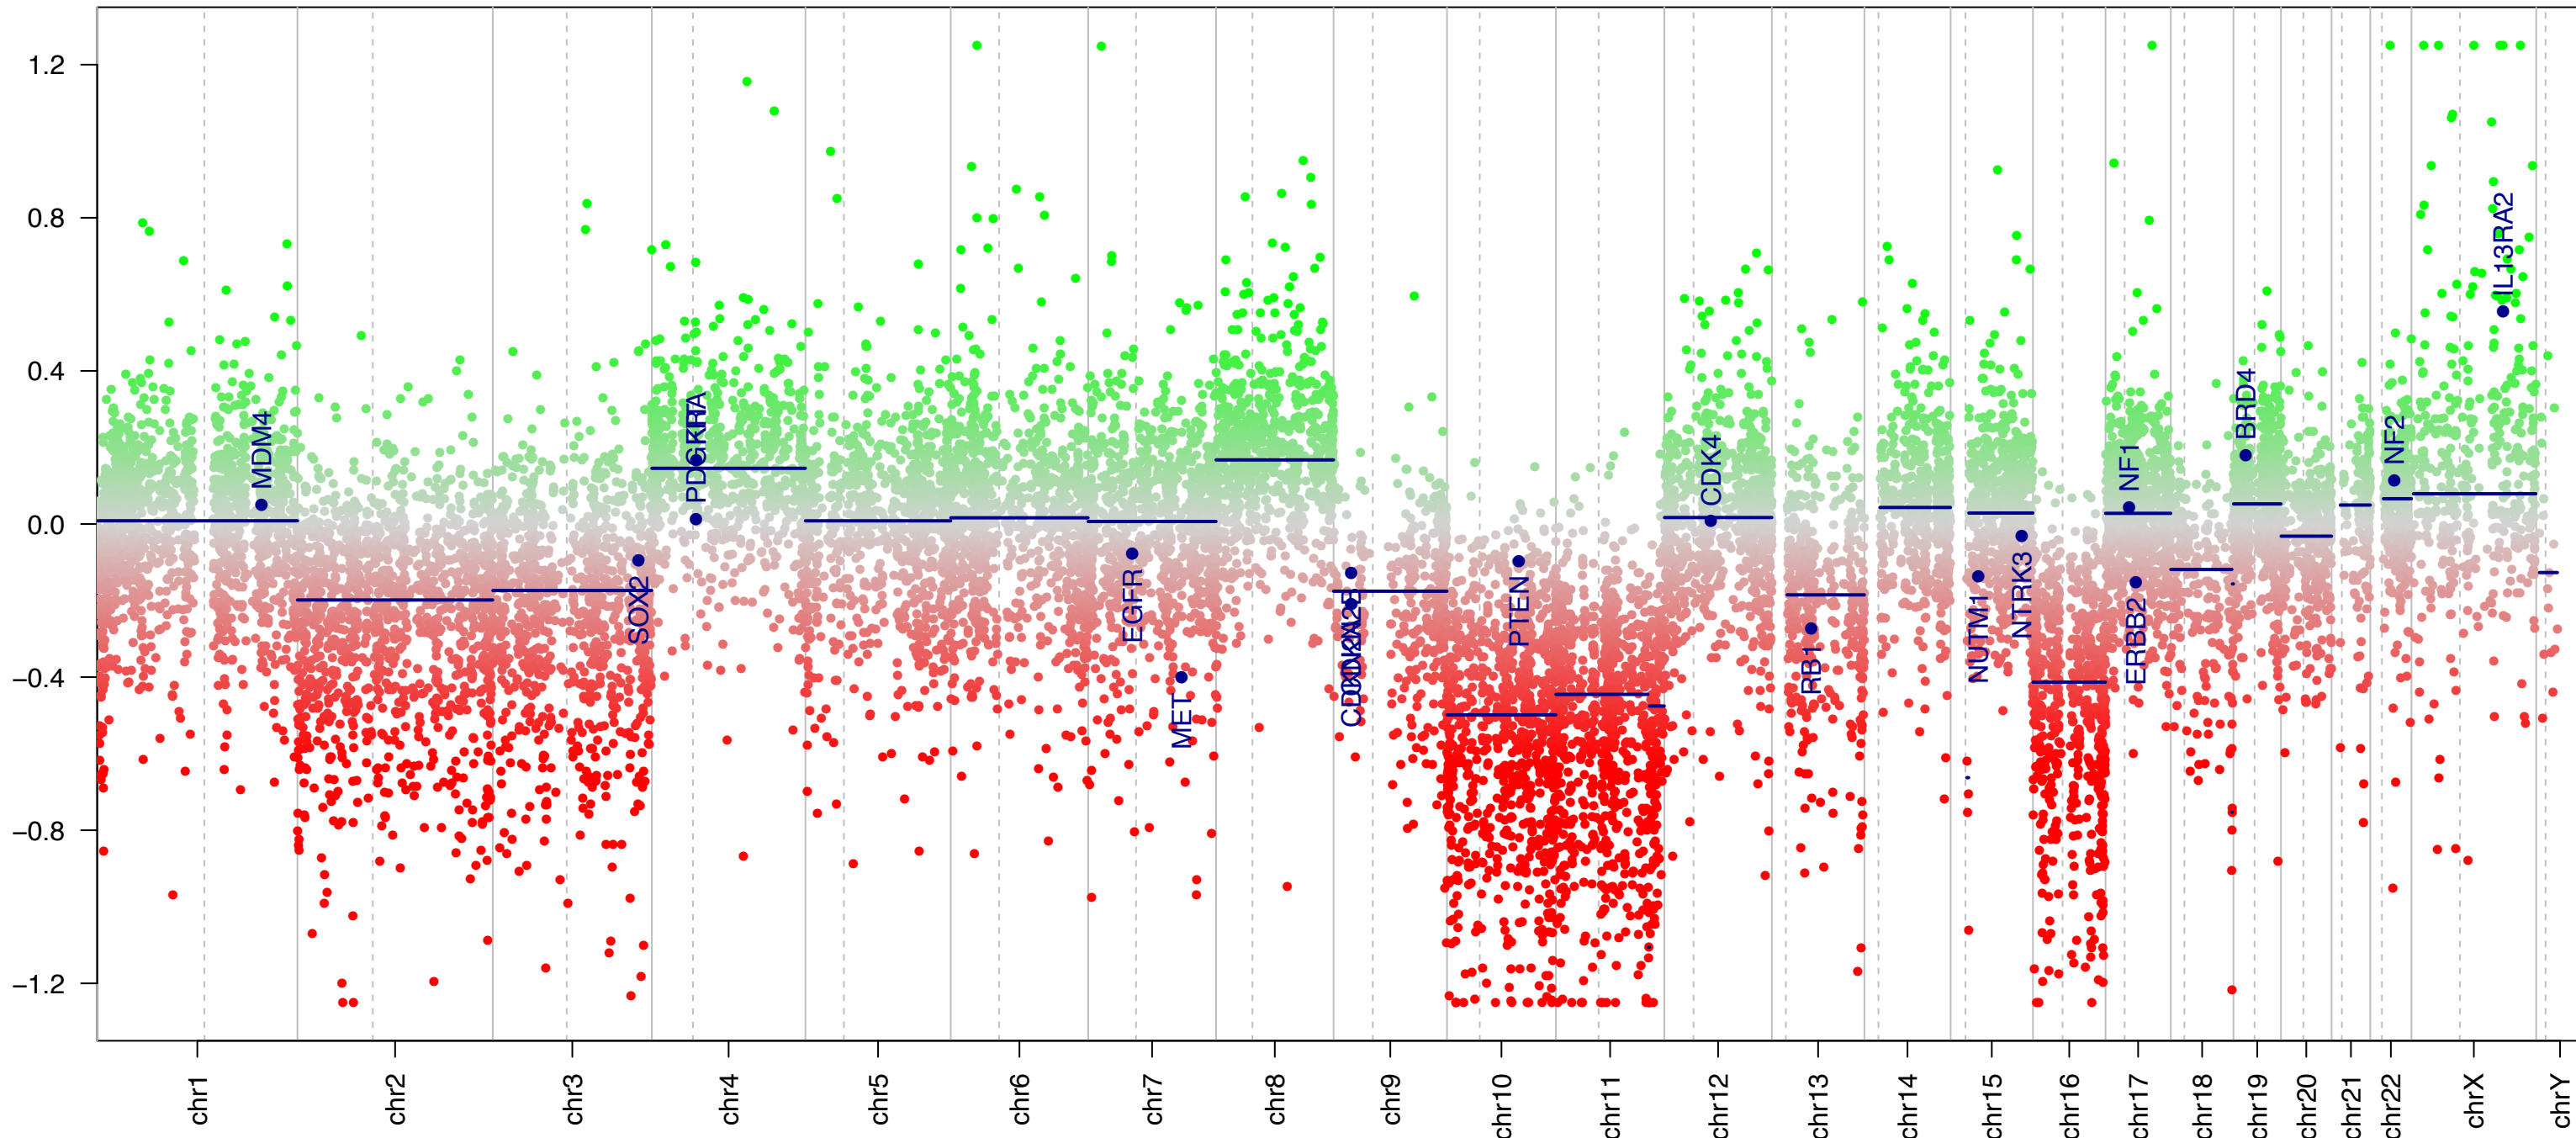

Case 9

206054060064\_R01C01

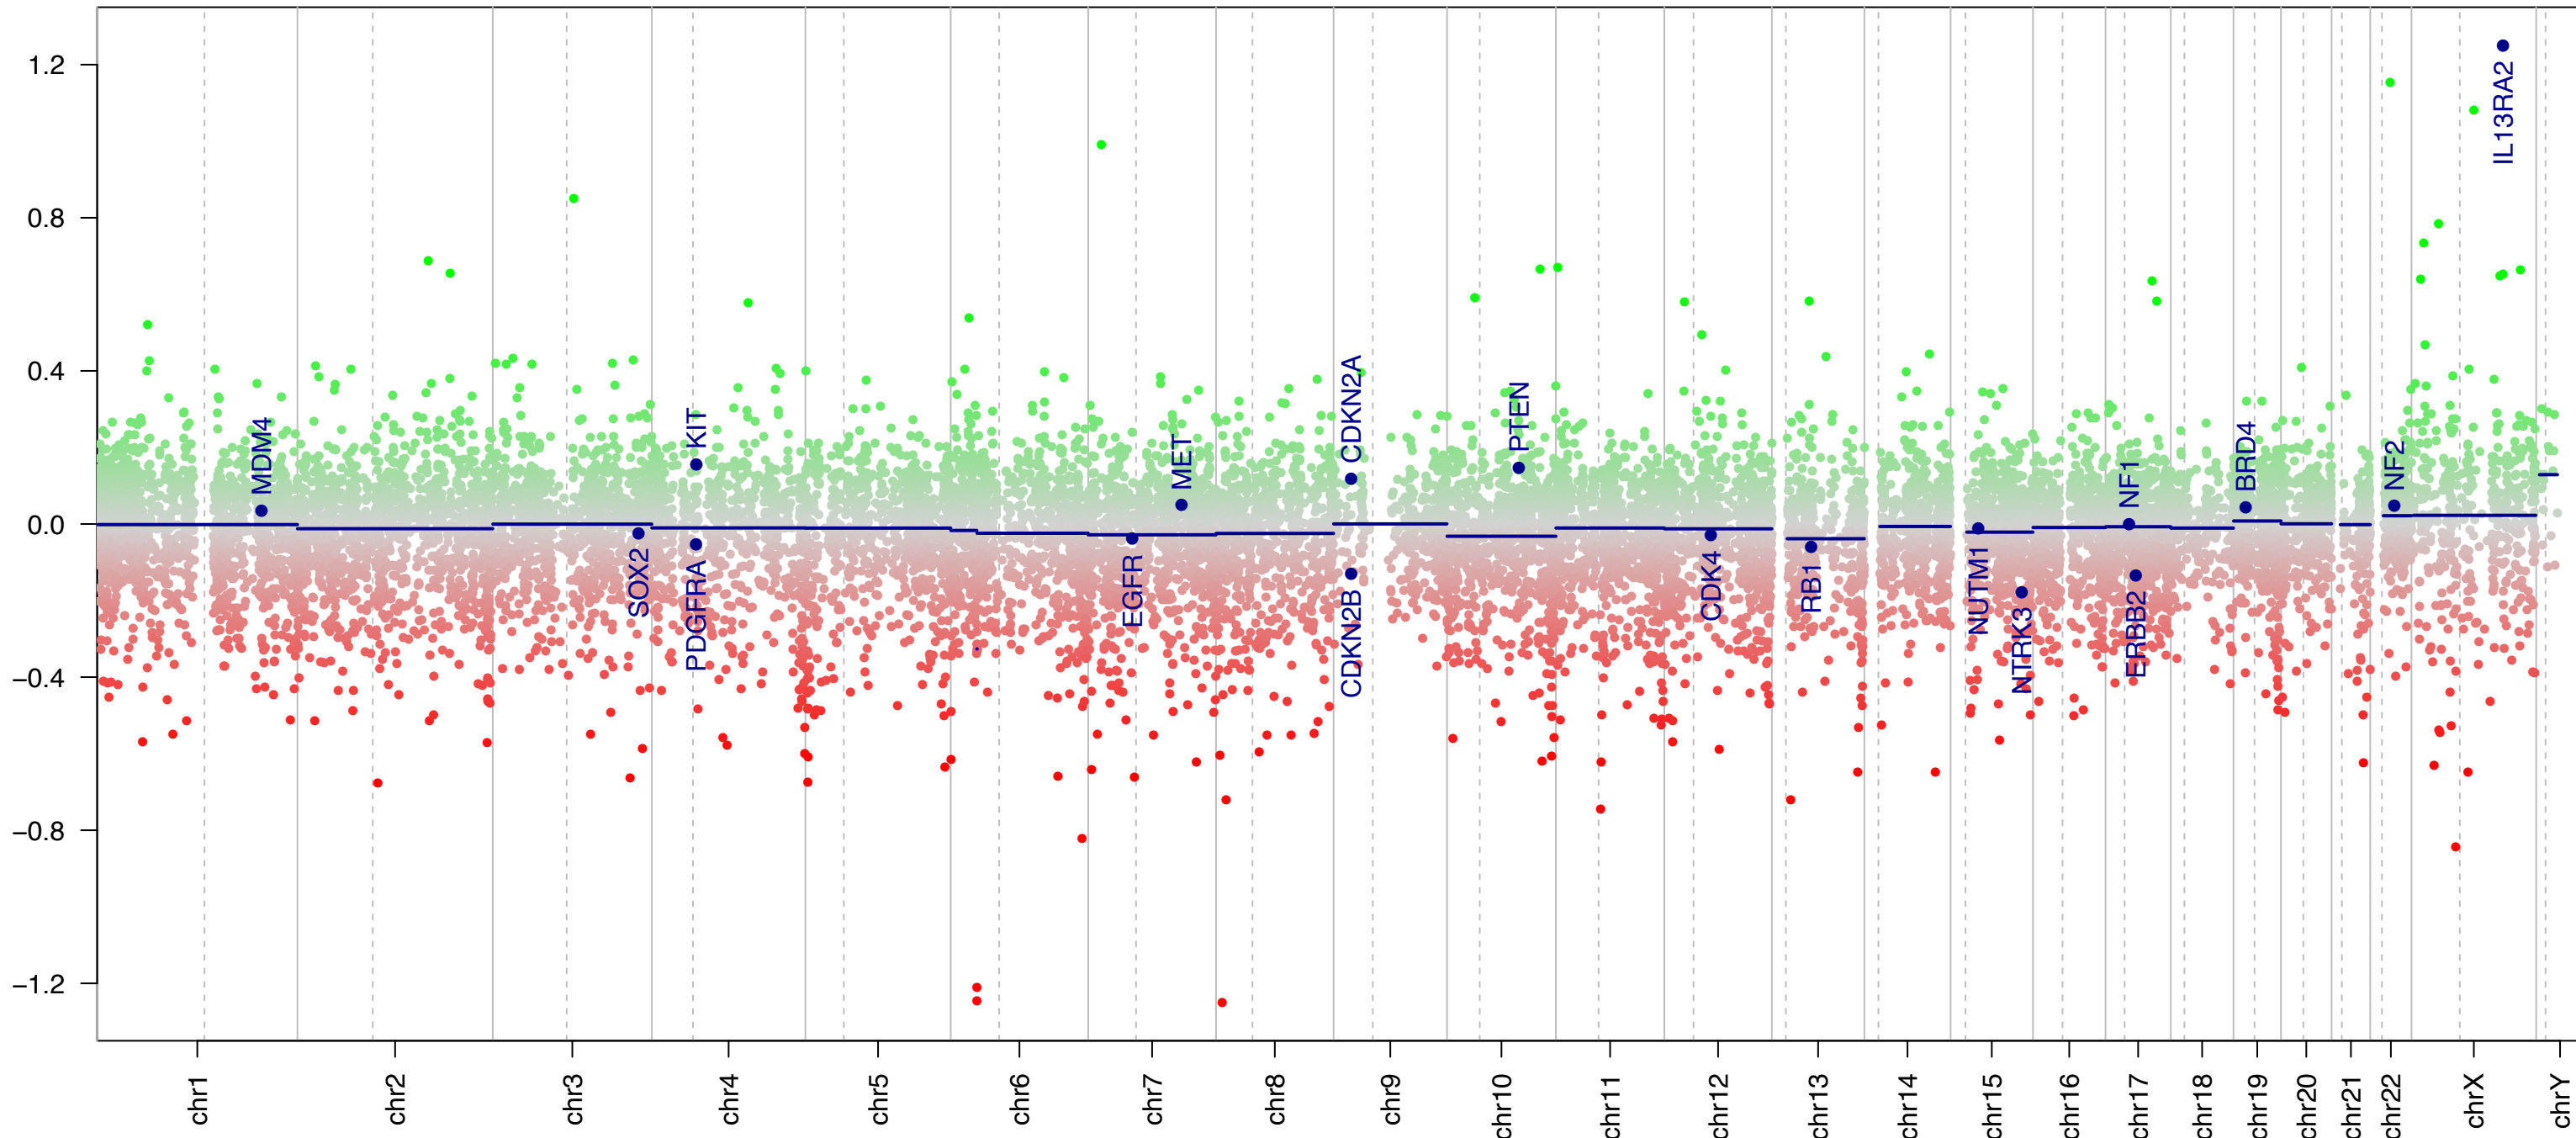

Case 10

206054060064\_R02C01

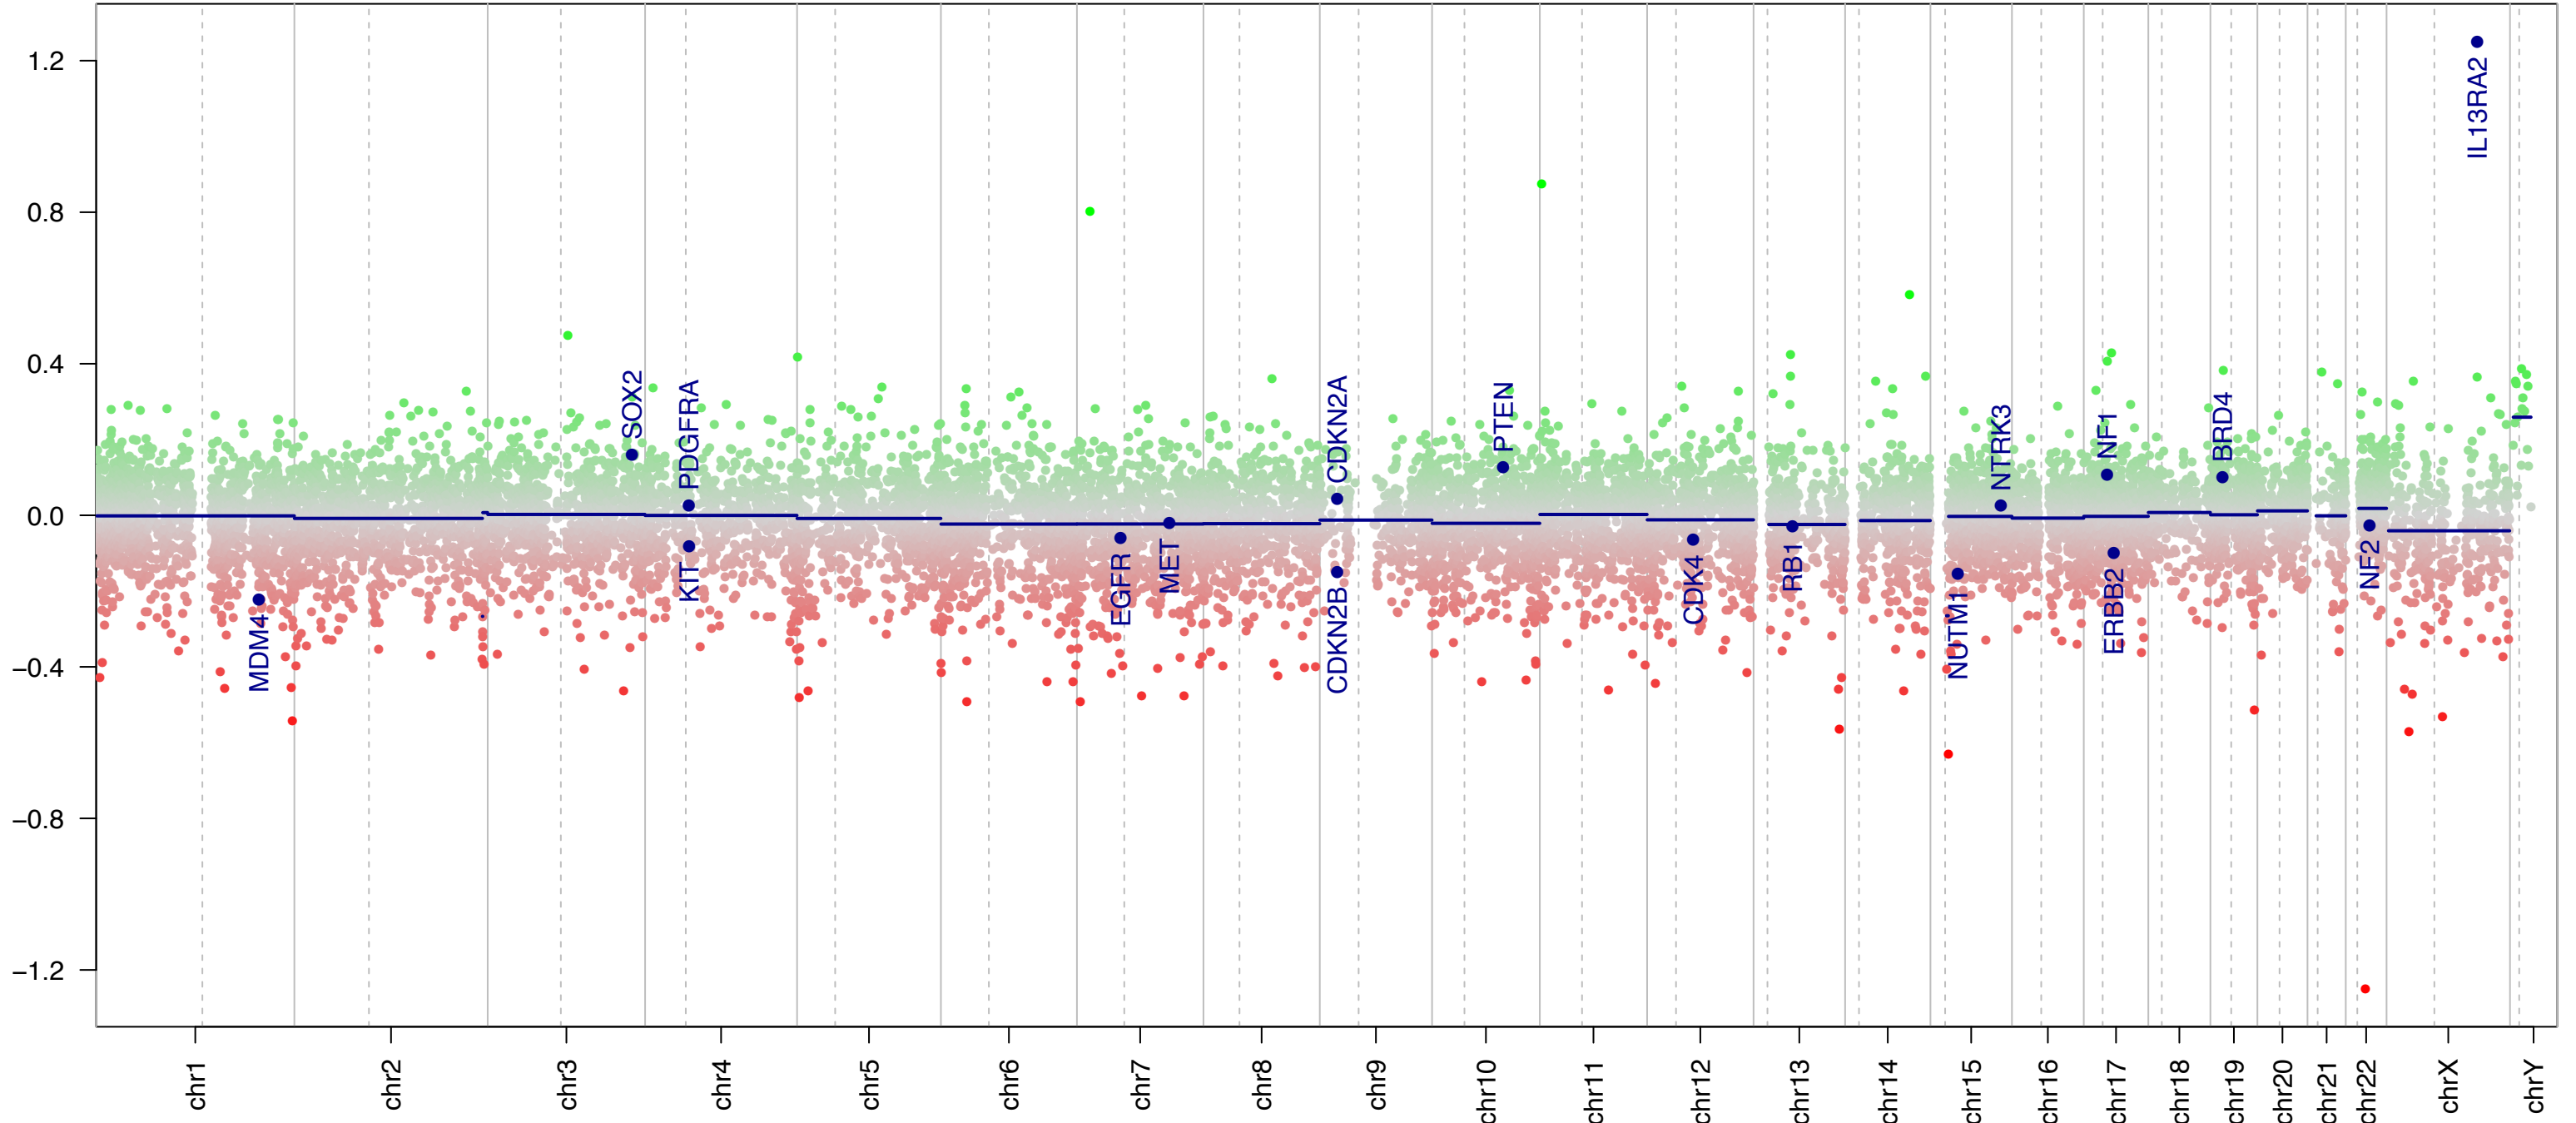

Case 3

205982890041\_R07C01

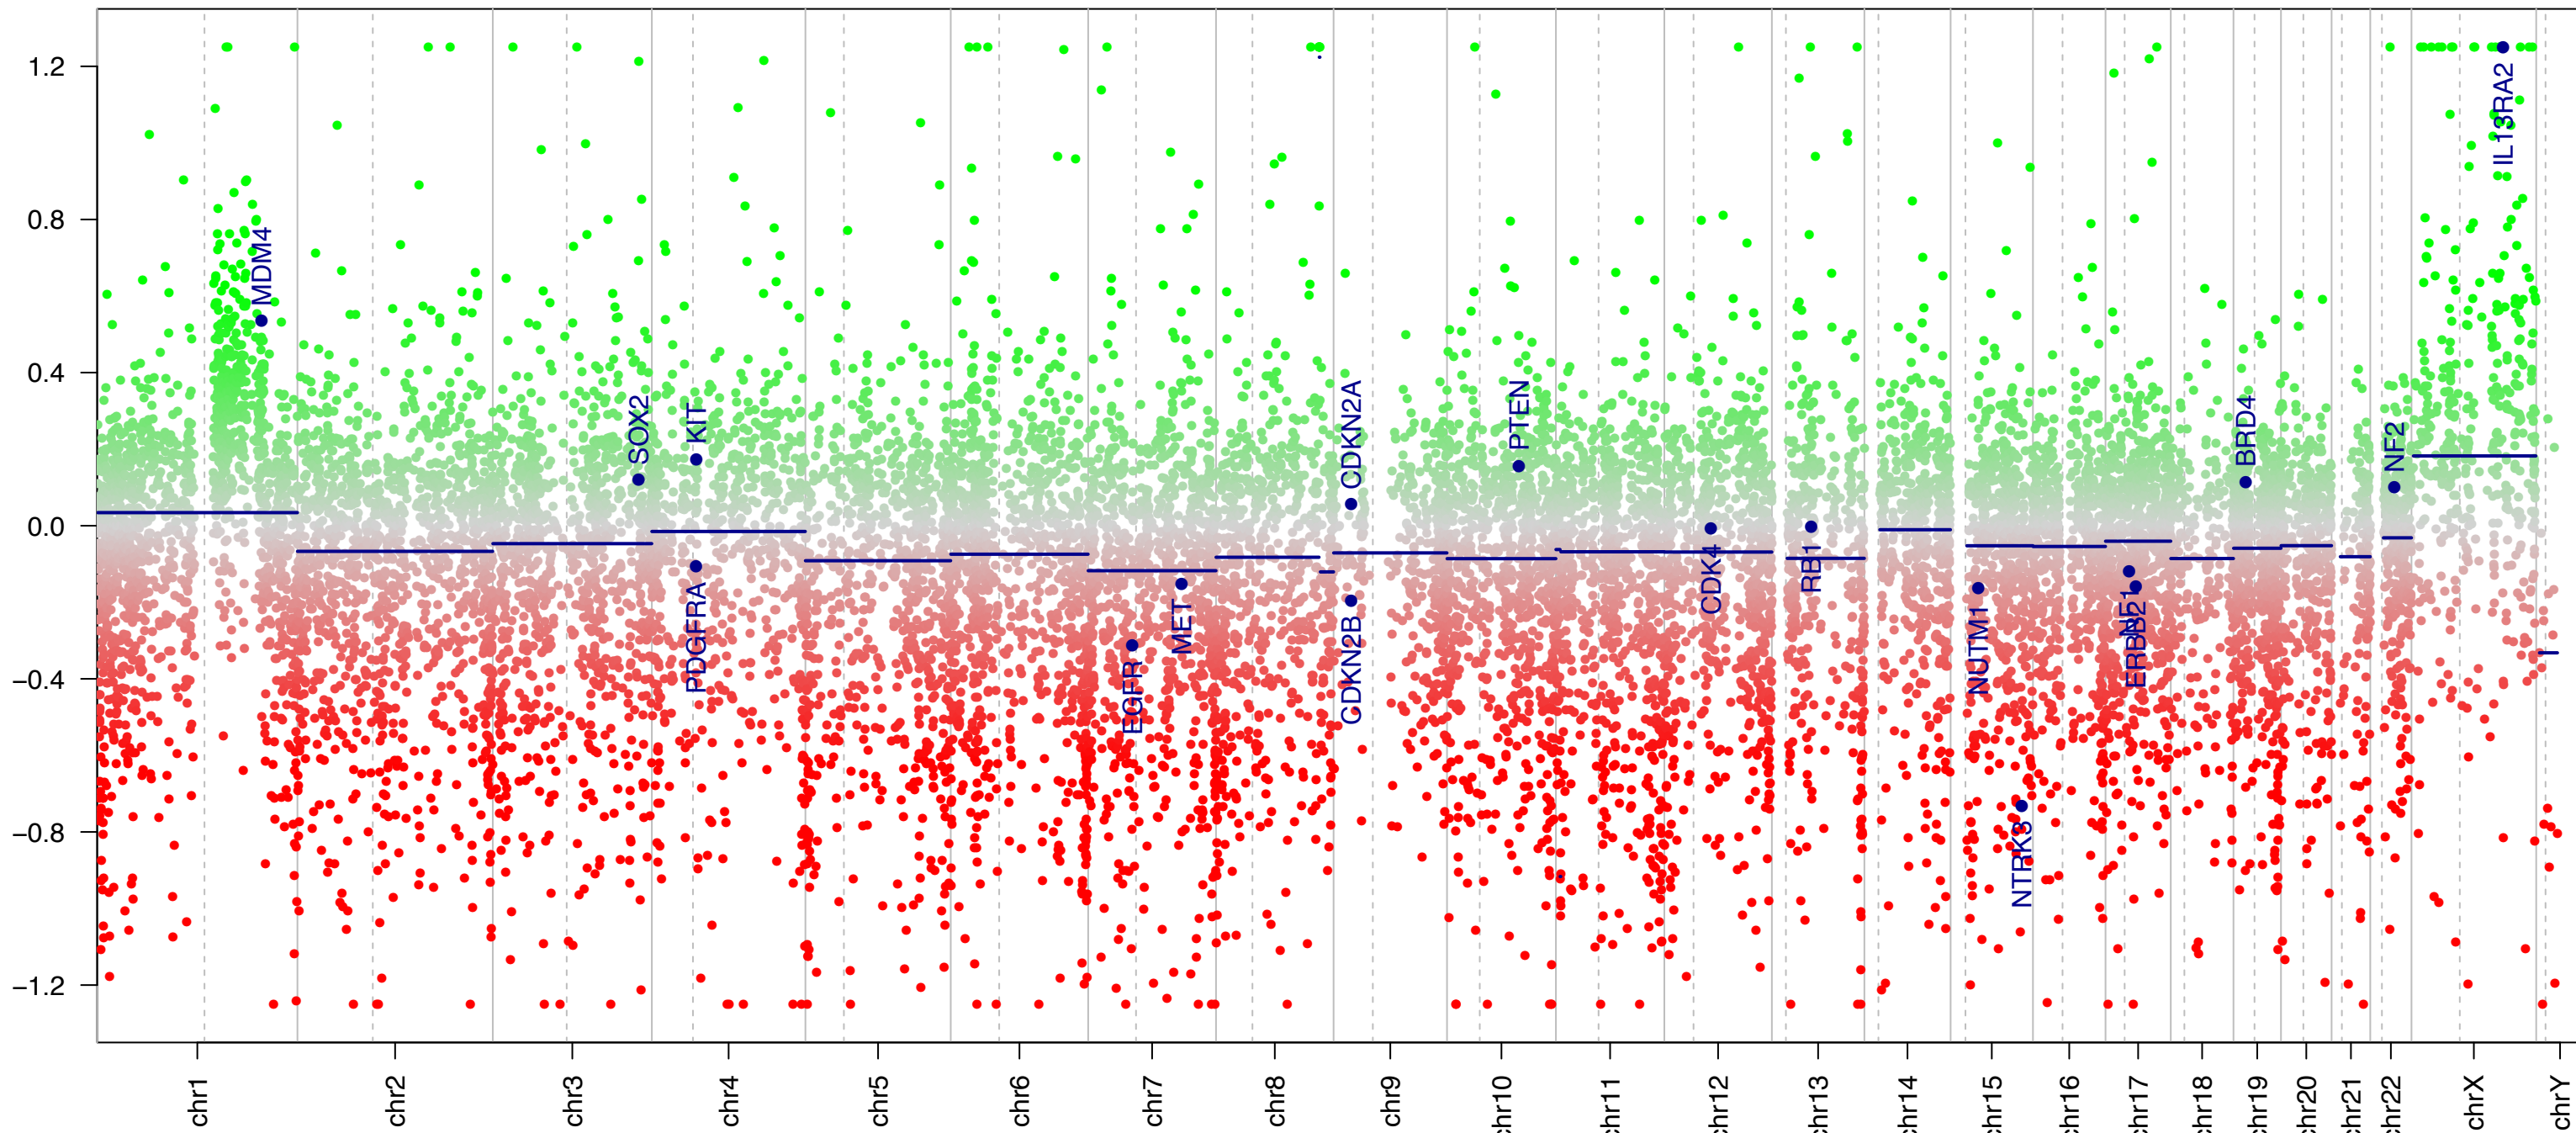

Supplement: NIHMS1996813-supplement-1.pdf [file NIHMS1996813-supplement-1.pdf]
